# Supplementary material
Source: publisher figshare collection journal article supplement (https://tandf.figshare.com/articles/dataset/_/8287628)
Supplement: Supplementary file 1 [file 2]

Table S1. Taxonomic sampling of *Oligoryzomys* used in the present study.

| Taxon                | Locality                                                              | Locality legend in the map | Vouchers' Museum and (Field) Numbers | GenBank or (BOLD) Accession Number | Pseudogene | Reference               |
|----------------------|-----------------------------------------------------------------------|----------------------------|--------------------------------------|------------------------------------|------------|-------------------------|
| <i>O. delicatus</i>  | French Guiana, Macouria, Bellefontaine                                | 3                          | MHNG-1990.038 (M911_JAG)             | MN015516                           |            | present paper           |
| <i>O. delicatus</i>  | French Guiana, Macouria, crique Brémont                               | 4                          | MHNG-1990.050 (M908_JAG)             | MN015519                           |            | present paper           |
| <i>O. delicatus</i>  | French Guiana, Macouria, crique Brémont                               | 4                          | MHNG-1990.049 (M915_JAG)             | MN015518                           |            | present paper           |
| <i>O. delicatus</i>  | French Guiana, Remire-Montjoly, Remire                                | 5                          | MHNG-1979.040 (T6120)                | MN015502                           |            | present paper           |
| <i>O. delicatus</i>  | French Guiana, Macouria, Paramana                                     | 6                          | MHNG-1990.022 (M902_JAG)             | MN015517                           |            | present paper           |
| <i>O. flavescens</i> | Brazil, São Paulo, Pedreira                                           | 47                         | MN53275 (CRB1405)                    | MF951064                           |            | da Cruz & Weksler, 2018 |
| <i>O. flavescens</i> | Brazil, Rio Grande do Sul, Aratiba                                    | 53                         | MN63873 (CRB1932)                    | MN019568                           |            | present paper           |
| <i>O. flavescens</i> | Brazil, Rio Grande do Sul, Aratiba                                    | 53                         | MN62161 (CRB1990)                    | MN019569                           |            | present paper           |
| <i>O. flavescens</i> | Brazil, Rio Grande do Sul, Terra de Areia                             | 61                         | UFPB7430 (JR467)                     | GU938892                           | *          | Müller et al., 2013     |
| <i>O. flavescens</i> | Brazil, Rio Grande do Sul, Terra de Areia                             | 61                         | UFPB7428 (JR258)                     | GU938893                           | *          | Müller et al., 2013     |
| <i>O. flavescens</i> | Brazil, Rio Grande do Sul, Terra de Areia                             | 61                         | UFPB7429 (JR259)                     | GU938894                           | *          | Müller et al., 2013     |
| <i>O. flavescens</i> | Brazil, Rio Grande do Sul, Terra de Areia                             | 61                         | UFPB7426 (JR209)                     | GU938985                           | *          | Müller et al., 2013     |
| <i>O. flavescens</i> | Brazil, Rio Grande do Sul, Terra de Areia                             | 61                         | UFPB7425 (JR202)                     | GU938986                           | *          | Müller et al., 2013     |
| <i>O. flavescens</i> | Brazil, Rio Grande do Sul, Terra de Areia                             | 61                         | UFPB7427 (JR210)                     | GU938987                           | *          | Müller et al., 2013     |
| <i>O. flavescens</i> | Brazil, Rio Grande do Sul, Alegrete                                   | 62                         | UFPB7431 (JR332)                     | GU938988                           | *          | Müller et al., 2013     |
| <i>O. flavescens</i> | Brazil, Rio Grande do Sul, Imbé                                       | 64                         | (LF1065)                             | MN015486                           |            | present paper           |
| <i>O. flavescens</i> | Brazil, Rio Grande do Sul, Imbé                                       | 64                         | (LF1016)                             | MN015454                           |            | present paper           |
| <i>O. fulvescens</i> | Mexico, Yucatan, Laguna Becanchen                                     | not plotted                | ROM96523                             | JQ601044                           |            | GenBank                 |
| <i>O. fulvescens</i> | Mexico, Campeche, 11 Km S of Candelaria                               | not plotted                | ROM-ASK2505                          | JF491724                           |            | GenBank                 |
| <i>O. fulvescens</i> | Mexico, Campeche, 11 Km S of Candelaria                               | not plotted                | ROM-ASK233                           | JF491725                           |            | GenBank                 |
| <i>O. fulvescens</i> | Mexico, Campeche, 16 Km N of Champoton                                | not plotted                | ROM96002                             | JF491719                           |            | GenBank                 |
| <i>O. fulvescens</i> | Mexico, Campeche, 3.7 Km Se of Chekubul                               | not plotted                | ROM96401                             | JF491693                           |            | GenBank                 |
| <i>O. fulvescens</i> | Mexico, Campeche, 39 Km S of Candelaria                               | not plotted                | ROM-ASK2511                          | JF491692                           |            | GenBank                 |
| <i>O. fulvescens</i> | Mexico, Campeche, 52 Km Sw of Champoton                               | not plotted                | ROM95930                             | JF491694                           |            | GenBank                 |
| <i>O. fulvescens</i> | Mexico, Campeche, 52 Km Sw of Champoton                               | not plotted                | ROM95929                             | JF491696                           |            | GenBank                 |
| <i>O. fulvescens</i> | Mexico, Campeche, 52 Km Sw of Champoton                               | not plotted                | ROM95928                             | JF491698                           |            | GenBank                 |
| <i>O. fulvescens</i> | Mexico, Campeche, 52 Km Sw of Champoton                               | not plotted                | ROM95932                             | JF491718                           |            | GenBank                 |
| <i>O. fulvescens</i> | Mexico, Campeche, 52 Km Sw of Champoton                               | not plotted                | ROM95931                             | JF491721                           |            | GenBank                 |
| <i>O. fulvescens</i> | Mexico, Campeche, 9.5 Km S of Constitucion                            | not plotted                | ROM-ASK2618                          | JF491695                           |            | GenBank                 |
| <i>O. fulvescens</i> | Mexico, Campeche, 9.5 Km S of Constitucion                            | not plotted                | ROM-ASK2598                          | JF491705                           |            | GenBank                 |
| <i>O. fulvescens</i> | Mexico, Campeche, 9.5 Km S of Constitucion                            | not plotted                | ROM-ASK2619                          | JF491722                           |            | GenBank                 |
| <i>O. fulvescens</i> | Mexico, Campeche, La Valeta                                           | not plotted                | ROM95211                             | EU095456                           |            | Borisenko et al. 2008   |
| <i>O. fulvescens</i> | Mexico, Campeche, La Valeta                                           | not plotted                | ROM95212                             | JF491701                           |            | GenBank                 |
| <i>O. fulvescens</i> | Mexico, Chiapas, 12 Km N of Berriozabal                               | not plotted                | ROM-ASK666                           | JF491689                           |            | GenBank                 |
| <i>O. fulvescens</i> | Mexico, Chiapas, 12 Km N of Berriozabal                               | not plotted                | ROM-ASK688                           | JF491714                           |            | GenBank                 |
| <i>O. fulvescens</i> | Mexico, Chiapas, 12 Km N of Berriozabal                               | not plotted                | ROM-ASK687                           | JF491715                           |            | GenBank                 |
| <i>O. fulvescens</i> | Mexico, Chiapas, 12 Km Sw of Ixtapa                                   | not plotted                | ROM97572                             | JF491690                           |            | GenBank                 |
| <i>O. fulvescens</i> | Mexico, Chiapas, 12 Km Sw of Ixtapa                                   | not plotted                | ROM97613                             | JF491707                           |            | GenBank                 |
| <i>O. fulvescens</i> | Mexico, Chiapas, 12 Km Sw of Ixtapa                                   | not plotted                | ROM97612                             | JF491709                           |            | GenBank                 |
| <i>O. fulvescens</i> | Mexico, Chiapas, 12 Km Sw of Ixtapa                                   | not plotted                | ROM97610                             | JF491711                           |            | GenBank                 |
| <i>O. fulvescens</i> | Mexico, Chiapas, 12 Km Sw of Ixtapa                                   | not plotted                | ROM97609                             | JF491712                           |            | GenBank                 |
| <i>O. fulvescens</i> | Mexico, Chiapas, 12 Km Sw of Ixtapa                                   | not plotted                | ROM97608                             | JF491713                           |            | GenBank                 |
| <i>O. fulvescens</i> | Mexico, Chiapas, 6.6 Km S of Palenque By Road                         | not plotted                | ROM-ASK78                            | JF491699                           |            | GenBank                 |
| <i>O. fulvescens</i> | Mexico, Chiapas, 6.6 Km S of Palenque By Road                         | not plotted                | ROM-ASK77                            | JF491700                           |            | GenBank                 |
| <i>O. fulvescens</i> | Mexico, Chiapas, 9 Km S of Palenque By Road                           | not plotted                | ROM-ASK60                            | JF491691                           |            | GenBank                 |
| <i>O. fulvescens</i> | Mexico, Chiapas, 9.5 Km S of Palenque By Road                         | not plotted                | ROM-ASK58                            | JF491723                           |            | GenBank                 |
| <i>O. fulvescens</i> | Mexico, Tabasco, 27 Km S of El Triunfo, 14 Km E of El Triunfo         | not plotted                | ROM-ASK2526                          | JF491702                           |            | GenBank                 |
| <i>O. fulvescens</i> | Mexico, Tabasco, 27 Km S of El Triunfo, 14 Km E of El Triunfo         | not plotted                | ROM-ASK2522                          | JF491704                           |            | GenBank                 |
| <i>O. fulvescens</i> | Mexico, Tabasco, 3.8 Km Sw of Ruinas Acalan                           | not plotted                | ROM-ASK162                           | JF491708                           |            | GenBank                 |
| <i>O. fulvescens</i> | Mexico, Tabasco, 5 Km N of Jonuta                                     | not plotted                | ROM96215                             | JF491697                           |            | GenBank                 |
| <i>O. fulvescens</i> | Mexico, Tamaulipas, 4 Km W of La Carbonera, 46.5 Km E of San Fernando | not plotted                | ROM96127                             | JF491717                           |            | GenBank                 |
| <i>O. fulvescens</i> | Mexico, Tamaulipas, 4 Km W of La Carbonera, 46.5 Km E of San Fernando | not plotted                | ROM96126                             | JF491720                           |            | GenBank                 |
| <i>O. fulvescens</i> | Mexico, Tamaulipas, 5 Km N of Soto La Marina                          | not plotted                | ROM96111                             | JF491686                           |            | GenBank                 |

Table S1. Taxonomic sampling of *Oligoryzomys* used in the present study.

|                        |                                                                     |             |                   |          |   |                         |
|------------------------|---------------------------------------------------------------------|-------------|-------------------|----------|---|-------------------------|
| <i>O. fulvescens</i>   | Mexico, Veracruz, 18 Km Nw of Teocelo                               | not plotted | ROM-YHM233        | JF491716 |   | GenBank                 |
| <i>O. fulvescens</i>   | Mexico, Veracruz, 300 M Nw of Cascadas De Texolo, 1.5 Km Se of Xico | not plotted | ROM-YHM190        | JF491710 |   | GenBank                 |
| <i>O. fulvescens</i>   | Mexico, Yucatan, 1.5 Km N of Labna                                  | not plotted | ROM96482          | JF491703 |   | GenBank                 |
| <i>O. fulvescens</i>   | Mexico, Yucatan, Laguna Becanchen                                   | not plotted | ROM-FN30424       | JF491685 |   | GenBank                 |
| <i>O. fulvescens</i>   | Mexico, Yucatan, Laguna Becanchen                                   | not plotted | ROM-FN30423       | JF491687 |   | GenBank                 |
| <i>O. fulvescens</i>   | Mexico, Yucatan, Laguna Becanchen                                   | not plotted | ROM-FN30422       | JF491688 |   | GenBank                 |
| <i>O. fulvescens</i>   | Mexico, Yucatan, Laguna Becanchen                                   | not plotted | ROM-FN30461       | JF491706 |   | GenBank                 |
| <i>O. mottogrossae</i> | Brazil, Mato Grosso, São José do Xingú                              | 16          | (CRB2788)         | MN019601 |   | present paper           |
| <i>O. mottogrossae</i> | Brazil, Mato Grosso, São José do Xingú                              | 16          | (CRB2793)         | MN019602 |   | present paper           |
| <i>O. mottogrossae</i> | Brazil, Goiás, Teresina de Goiás, Fazenda Vão dos Bois              | 21          | (CRB708)          | MN019603 |   | present paper           |
| <i>O. mottogrossae</i> | Brazil, Goiás, Teresina de Goiás, Fazenda Vão dos Bois              | 21          | (CRB733)          | MN019604 |   | present paper           |
| <i>O. mottogrossae</i> | Brazil, Goiás, Teresina de Goiás, Fazenda Vão dos Bois              | 21          | (CRB747)          | MN019605 |   | present paper           |
| <i>O. mottogrossae</i> | Brazil, Goiás, Colinas do Sul, Rio Tocantinzinho                    | 23          | MN36363           | MN015497 |   | present paper           |
| <i>O. mottogrossae</i> | Brazil, Goiás, Colinas do Sul, Rio Tocantinzinho                    | 23          | MN36746           | MF951063 |   | da Cruz & Weksler, 2018 |
| <i>O. mottogrossae</i> | Brazil, Mato Grosso do Sul, Corumbá                                 | 30          | (LBCE5718)        | MF951056 |   | da Cruz & Weksler, 2018 |
| <i>O. mottogrossae</i> | Brazil, Mato Grosso do Sul, Corumbá                                 | 30          | (LBCE5689)        | MN019617 |   | present paper           |
| <i>O. mottogrossae</i> | Brazil, Mato Grosso do Sul, Corumbá                                 | 30          | (LBCE5690)        | MN019618 |   | present paper           |
| <i>O. mottogrossae</i> | Brazil, Mato Grosso do Sul, Corumbá                                 | 30          | (LBCE5720)        | MN019619 |   | present paper           |
| <i>O. mottogrossae</i> | Brazil, Mato Grosso do Sul, Cassilândia                             | 31          | (LBCE12111)       | MN019606 |   | present paper           |
| <i>O. mottogrossae</i> | Brazil, Mato Grosso do Sul, Corumbá                                 | 30          | (LBCE5719)        | MF951057 |   | da Cruz & Weksler, 2018 |
| <i>O. messorius</i>    | Venezuela, Amazonas, Pozon, 50 Km NE of Puerto Ayacucho             | 1           | ROM10782          | EU095455 |   | Borisenko et al. 2008   |
| <i>O. messorius</i>    | Venezuela, Amazonas, Pozon, 50 Km Ne of Puerto Ayacucho             | 1           | ROM107871         | JF491684 |   | GenBank                 |
| <i>O. messorius</i>    | Guyana, Upper Takutu-Upper Essequibo, 5 Km Se of Surama             | 2           | ROM103349         | JF491726 |   | GenBank                 |
| <i>O. messorius</i>    | Guyana, Upper Takutu-Upper Essequibo, 5 Km Se of Surama             | 2           | ROM103348         | JF491727 |   | GenBank                 |
| <i>O. messorius</i>    | French Guiana, Saul, znieff Coudreau                                | 7           | (M829_JAG)        | MN015520 |   | present paper           |
| <i>O. messorius</i>    | Brazil, Roraima, Caracará                                           | 9           | MN70475 (JAO2135) | MN015513 |   | present paper           |
| <i>O. messorius</i>    | Brazil, Amapá, Porto Grande, Horto Matapi                           | 11          | IEPA2481 (AM48)   | MF951058 |   | da Cruz & Weksler, 2018 |
| <i>O. microtis</i>     | Brazil, Tocantins, São Sebastião                                    | 13          | MN76192 (FO05)    | MN015482 |   | present paper           |
| <i>O. microtis</i>     | Brazil, Tocantins, São Sebastião                                    | 13          | MN76194 (FO07)    | MN015501 |   | present paper           |
| <i>O. microtis</i>     | Brazil, Tocantins, São Sebastião                                    | 13          | MN76197 (FO10)    | MN015449 |   | present paper           |
| <i>O. microtis</i>     | Brazil, Tocantins, São Sebastião                                    | 13          | MN76200 (FO13)    | MN015476 |   | present paper           |
| <i>O. microtis</i>     | Brazil, Tocantins, São Sebastião                                    | 13          | MN76203 (FO16)    | MN015473 |   | present paper           |
| <i>O. microtis</i>     | Brazil, Tocantins, São Sebastião                                    | 13          | MN76205 (FO18)    | MN015437 |   | present paper           |
| <i>O. microtis</i>     | Brazil, Tocantins, São Sebastião                                    | 13          | MN76206 (FO19)    | MN015504 |   | present paper           |
| <i>O. microtis</i>     | Brazil, Tocantins, São Sebastião                                    | 13          | MN76207 (FO20)    | MN015445 |   | present paper           |
| <i>O. microtis</i>     | Brazil, Tocantins, São Sebastião                                    | 13          | MN76209 (FO22)    | MN015463 |   | present paper           |
| <i>O. microtis</i>     | Brazil, Tocantins, São Sebastião                                    | 13          | MN76210 (FO23)    | MN015462 |   | present paper           |
| <i>O. microtis</i>     | Brazil, Tocantins, São Sebastião                                    | 13          | MN76212 (FO25)    | MN015484 |   | present paper           |
| <i>O. microtis</i>     | Brazil, Tocantins, São Sebastião                                    | 13          | MN76213 (FO26)    | MN015434 |   | present paper           |
| <i>O. microtis</i>     | Brazil, Tocantins, São Sebastião                                    | 13          | MN76216 (FO29)    | MN015515 |   | present paper           |
| <i>O. microtis</i>     | Brazil, Tocantins, São Sebastião                                    | 13          | MN76217 (FO30)    | MN015464 |   | present paper           |
| <i>O. microtis</i>     | Brazil, Tocantins, São Sebastião                                    | 13          | MN76223 (FO36)    | MN015477 |   | present paper           |
| <i>O. microtis</i>     | Brazil, Tocantins, São Sebastião                                    | 13          | MN76224 (FO39)    | MN015480 |   | present paper           |
| <i>O. microtis</i>     | Brazil, Tocantins, São Sebastião                                    | 13          | MN76226 (FO43)    | MN015429 |   | present paper           |
| <i>O. microtis</i>     | Brazil, Tocantins, São Sebastião                                    | 13          | MN76227 (FO45)    | MN015446 |   | present paper           |
| <i>O. microtis</i>     | Brazil, Tocantins, São Sebastião                                    | 13          | MN76229 (FO47)    | MN015438 |   | present paper           |
| <i>O. microtis</i>     | Brazil, Tocantins, Couto Magalhães                                  | 14          | MN76925 (PQ23)    | MN015457 |   | present paper           |
| <i>O. microtis</i>     | Brazil, Tocantins, Couto Magalhães                                  | 14          | MN76926 (PQ24)    | MN015461 |   | present paper           |
| <i>O. microtis</i>     | Brazil, Amazonas, Manacapuru                                        | 10          | MN84349 (CRB3004) | MF951059 |   | da Cruz & Weksler, 2018 |
| <i>O. microtis</i>     | Brazil, Amazonas, Manacapuru                                        | 10          | MN84349 (CRB3004) | MN032106 | * | present paper           |
| <i>O. moojeni</i>      | Brazil, Tocantins, Lajeado                                          | 15          | MN76752 (LJ34)    | MN015491 |   | present paper           |
| <i>O. moojeni</i>      | Brazil, Tocantins, Lajeado                                          | 15          | MN76753 (LJ35)    | MN015456 |   | present paper           |
| <i>O. moojeni</i>      | Brazil, Goiás, Colinas do Sul, Rio Tocantinzinho                    | 23          | MN36411           | MN015471 |   | present paper           |
| <i>O. moojeni</i>      | Brazil, Goiás, Colinas do Sul, Rio Tocantinzinho                    | 23          | MN36413           | MN015467 |   | present paper           |

Table S1. Taxonomic sampling of *Oligoryzomys* used in the present study.

|                    |                                                                     |    |                    |          |                         |
|--------------------|---------------------------------------------------------------------|----|--------------------|----------|-------------------------|
| <i>O. moojeni</i>  | Brazil, Goiás, Colinas do Sul, Rio Tocantizinho                     | 23 | MN36414            | MN015508 | present paper           |
| <i>O. moojeni</i>  | Brazil, Goiás, Colinas do Sul, Rio Tocantizinho                     | 23 | MN36357            | MF951062 | da Cruz & Weksler, 2018 |
| <i>O. moojeni</i>  | Brazil, Goiás, Colinas do Sul, Rio Tocantizinho                     | 23 | MN36361            | MN015478 | present paper           |
| <i>O. moojeni</i>  | Brazil, Goiás, Colinas do Sul, Rio Tocantizinho                     | 23 | MN36367            | MN015466 | present paper           |
| <i>O. moojeni</i>  | Brazil, Goiás, Colinas do Sul, Rio Tocantizinho                     | 23 | MN36345            | MN015506 | present paper           |
| <i>O. moojeni</i>  | Brazil, Goiás, Colinas do Sul, Rio Tocantizinho                     | 23 | MN36356            | MN015442 | present paper           |
| <i>O. moojeni</i>  | Brazil, Goiás, Cavalcante, Parque Nacional da Chapada dos Veadeiros | 25 | MN50287 (CRB1012)  | MF951070 | da Cruz & Weksler, 2018 |
| <i>O. moojeni</i>  | Brazil, Goiás, Cavalcante, Parque Nacional da Chapada dos Veadeiros | 25 | MN50314 (CRB1018)  | MF951068 | da Cruz & Weksler, 2018 |
| <i>O. moojeni</i>  | Brazil, Goiás, Cavalcante, Parque Nacional da Chapada dos Veadeiros | 25 | MN50287 (CRB1022)  | MN015583 | present paper           |
| <i>O. moojeni</i>  | Brazil, Goiás, Cavalcante, Parque Nacional da Chapada dos Veadeiros | 25 | MN50318 (CRB1054)  | MN031012 | present paper           |
| <i>O. moojeni</i>  | Brazil, Goiás, Cavalcante, Parque Nacional da Chapada dos Veadeiros | 25 | MN50316 (CRB1055)  | MN019570 | present paper           |
| <i>O. moojeni</i>  | Brazil, Goiás, Cavalcante, Parque Nacional da Chapada dos Veadeiros | 25 | MN50319 (CRB1056)  | MN019571 | present paper           |
| <i>O. moojeni</i>  | Brazil, Goiás, Cavalcante, Parque Nacional da Chapada dos Veadeiros | 25 | MN50320 (CRB1057)  | MF951071 | da Cruz & Weksler, 2018 |
| <i>O. moojeni</i>  | Brazil, Goiás, Cavalcante, Parque Nacional da Chapada dos Veadeiros | 25 | MN50308 (CRB902)   | MN019572 | present paper           |
| <i>O. moojeni</i>  | Brazil, Goiás, Cavalcante, Parque Nacional da Chapada dos Veadeiros | 25 | MN50378 (CRB937)   | MN019573 | present paper           |
| <i>O. moojeni</i>  | Brazil, Goiás, Cavalcante, Parque Nacional da Chapada dos Veadeiros | 25 | MN50309 (CRB948)   | MF951069 | da Cruz & Weksler, 2018 |
| <i>O. moojeni</i>  | Brazil, Goiás, Cavalcante, Parque Nacional da Chapada dos Veadeiros | 25 | MN50311 (CRB979)   | MN019574 | present paper           |
| <i>O. moojeni</i>  | Brazil, Goiás, Uruaçu                                               | 28 | MN37250            | MN015469 | present paper           |
| <i>O. nigripes</i> | Brazil, Goiás, Colinas do Sul, Rio Tocantizinho                     | 23 | MN36362            | MN015458 | present paper           |
| <i>O. nigripes</i> | Brazil, Goiás, Caldas Novas                                         | 29 | (OT5068)           | MN015475 | present paper           |
| <i>O. nigripes</i> | Brazil, Espírito Santo, Santa Teresa                                | 37 | MN74932 (SVS163)   | MN015595 | present paper           |
| <i>O. nigripes</i> | Brazil, Espírito Santo, Santa Teresa                                | 37 | (SVS168)           | MN019624 | present paper           |
| <i>O. nigripes</i> | Brazil, Espírito Santo, Santa Teresa                                | 37 | (SVS191)           | MN019625 | present paper           |
| <i>O. nigripes</i> | Brazil, Espírito Santo, Santa Teresa                                | 37 | (SVS193)           | MN019626 | present paper           |
| <i>O. nigripes</i> | Brazil, Espírito Santo, Santa Teresa                                | 37 | MN78381 (SVS221)   | MN019594 | present paper           |
| <i>O. nigripes</i> | Brazil, Espírito Santo, Santa Teresa                                | 37 | (SVS228)           | MN019627 | present paper           |
| <i>O. nigripes</i> | Brazil, Minas Gerais, Itatiaiuçu                                    | 38 | MN80447 (MW311)    | MN015431 | present paper           |
| <i>O. nigripes</i> | Brazil, Minas Gerais, Itatiaiuçu                                    | 38 | MN80442 (MW306)    | MN015453 | present paper           |
| <i>O. nigripes</i> | Brazil, Minas Gerais, Pouso Alto                                    | 39 | MN78761 (JFV0078)  | KF815406 | Vilela et al. 2014      |
| <i>O. nigripes</i> | Brazil, Rio de Janeiro, Nova Friburgo                               | 40 | MN81644 (CRB1454)  | MN015585 | present paper           |
| <i>O. nigripes</i> | Brazil, Rio de Janeiro, Nova Friburgo                               | 40 | (LBCE1827)         | MN019613 | present paper           |
| <i>O. nigripes</i> | Brazil, Rio de Janeiro, Nova Friburgo                               | 40 | (LBCE1828)         | MN019614 | present paper           |
| <i>O. nigripes</i> | Brazil, Rio de Janeiro, Nova Friburgo                               | 40 | (LBCE1845)         | MN019615 | present paper           |
| <i>O. nigripes</i> | Brazil, Rio de Janeiro, Nova Friburgo                               | 40 | (LBCE1848)         | MN019616 | present paper           |
| <i>O. nigripes</i> | Brazil, Rio de Janeiro, Sapucaia                                    | 41 | MN60622 (LBCE1459) | MN019585 | present paper           |
| <i>O. nigripes</i> | Brazil, Rio de Janeiro, Sapucaia                                    | 41 | MN60623 (LBCE1460) | MN019586 | present paper           |
| <i>O. nigripes</i> | Brazil, Rio de Janeiro, Sapucaia                                    | 41 | MN60629 (LBCE1466) | MN019587 | present paper           |
| <i>O. nigripes</i> | Brazil, Rio de Janeiro, Sapucaia                                    | 41 | MN60633 (LBCE1470) | MN019588 | present paper           |
| <i>O. nigripes</i> | Brazil, Rio de Janeiro, Sumidouro                                   | 42 | (LBCE1356)         | MN019607 | present paper           |
| <i>O. nigripes</i> | Brazil, Rio de Janeiro, Sumidouro                                   | 42 | (LBCE1357)         | MN019608 | present paper           |
| <i>O. nigripes</i> | Brazil, Rio de Janeiro, Sumidouro                                   | 42 | (LBCE1409)         | MN015587 | present paper           |
| <i>O. nigripes</i> | Brazil, Rio de Janeiro, Sumidouro                                   | 42 | (LBCE1456)         | MN019609 | present paper           |
| <i>O. nigripes</i> | Brazil, Rio de Janeiro, Sumidouro                                   | 42 | MN60637 (LBCE1474) | MN015588 | present paper           |
| <i>O. nigripes</i> | Brazil, Rio de Janeiro, Sumidouro                                   | 42 | (LBCE1658)         | MN019610 | present paper           |
| <i>O. nigripes</i> | Brazil, Rio de Janeiro, Sumidouro                                   | 42 | (LBCE1660)         | MN019611 | present paper           |
| <i>O. nigripes</i> | Brazil, Rio de Janeiro, Sumidouro                                   | 42 | (LBCE1661)         | MN019612 | present paper           |
| <i>O. nigripes</i> | Brazil, Rio de Janeiro, Sumidouro                                   | 42 | (LBCE1849)         | MN015589 | present paper           |
| <i>O. nigripes</i> | Brazil, Rio de Janeiro, Sumidouro                                   | 42 | (LBCE1850)         | MN015590 | present paper           |
| <i>O. nigripes</i> | Brazil, Rio de Janeiro, Cachoeiras de Macacú                        | 43 | (HGB-REGUA014)     | MN015450 | present paper           |
| <i>O. nigripes</i> | Brazil, Rio de Janeiro, Teresópolis                                 | 44 | MN67472 (FS10-88)  | MN015485 | present paper           |
| <i>O. nigripes</i> | Brazil, Rio de Janeiro, Teresópolis                                 | 44 | MN76063 (EDH238)   | MN015494 | present paper           |
| <i>O. nigripes</i> | Brazil, Rio de Janeiro, Parque Nacional da Serra dos Orgaos         | 45 | MN71983 (LBCE6468) | MF951065 | da Cruz & Weksler, 2018 |
| <i>O. nigripes</i> | Brazil, Rio de Janeiro, Parque Nacional da Serra dos Orgaos         | 45 | MN71984 (LBCE6469) | MF951073 | da Cruz & Weksler, 2018 |
| <i>O. nigripes</i> | Brazil, Rio de Janeiro, Parque Nacional da Serra dos Orgaos         | 45 | MN71985 (LBCE6470) | MF951066 | da Cruz & Weksler, 2018 |

Table S1. Taxonomic sampling of *Oligoryzomys* used in the present study.

|                    |                                                             |    |                    |          |   |                         |
|--------------------|-------------------------------------------------------------|----|--------------------|----------|---|-------------------------|
| <i>O. nigripes</i> | Brazil, Rio de Janeiro, Pinheiral                           | 46 | MN69828 (CEG079)   | MN015441 |   | present paper           |
| <i>O. nigripes</i> | Brazil, São Paulo, Pedreira                                 | 47 | MN66148 (CRB1247)  | MN019575 |   | present paper           |
| <i>O. nigripes</i> | Brazil, São Paulo, Pedreira                                 | 47 | MN66154 (CRB1407)  | MN019576 |   | present paper           |
| <i>O. nigripes</i> | Brazil, São Paulo, Pedreira                                 | 47 | MN62669 (CRB1408)  | MN015584 |   | present paper           |
| <i>O. nigripes</i> | Brazil, São Paulo, Pedreira                                 | 47 | MN66155 (CRB1414)  | MN019577 |   | present paper           |
| <i>O. nigripes</i> | Brazil, São Paulo, Pedreira                                 | 47 | MN66222 (CRB1422)  | MF951067 |   | da Cruz & Weksler, 2018 |
| <i>O. nigripes</i> | Brazil, São Paulo, Pedreira                                 | 47 | MN66157 (CRB1425)  | MN019578 |   | present paper           |
| <i>O. nigripes</i> | Brazil, Santa Catarina, Usina Hidrelétrica Quebra-Queixo    | 48 | FURB6884           | GU938971 | * | Müller et al., 2013     |
| <i>O. nigripes</i> | Brazil, Santa Catarina, Parque Nacional da Serra do Itajaí  | 49 | FURB9600           | GU938969 | * | Müller et al., 2013     |
| <i>O. nigripes</i> | Brazil, Santa Catarina, Jaborá                              | 50 | MN77838 (LBCE9603) | MN015592 |   | present paper           |
| <i>O. nigripes</i> | Brazil, Santa Catarina, Jaborá                              | 50 | MN77842 (LBCE9693) | MN015593 |   | present paper           |
| <i>O. nigripes</i> | Brazil, Santa Catarina, Jaborá                              | 50 | MN77852 (LBCE9900) | MN015594 |   | present paper           |
| <i>O. nigripes</i> | Brazil, Santa Catarina, Jaborá                              | 50 | MN69922 (LBCE6922) | MN015591 |   | present paper           |
| <i>O. nigripes</i> | Brazil, Santa Catarina, Jaborá                              | 50 | MN69919 (LBCE6902) | MN019589 |   | present paper           |
| <i>O. nigripes</i> | Brazil, Santa Catarina, Jaborá                              | 50 | MN69921 (LBCE6914) | MN019590 |   | present paper           |
| <i>O. nigripes</i> | Brazil, Santa Catarina, Jaborá                              | 50 | MN69932 (LBCE8057) | MN019591 |   | present paper           |
| <i>O. nigripes</i> | Brazil, Santa Catarina, Jaborá                              | 50 | MN69934 (LBCE8089) | MN019592 |   | present paper           |
| <i>O. nigripes</i> | Brazil, Santa Catarina, Jaborá                              | 50 | MN69935 (LBCE8092) | MN019593 |   | present paper           |
| <i>O. nigripes</i> | Brazil, Santa Catarina, Ita                                 | 51 | MN62122 (CRB1927)  | MN019580 |   | present paper           |
| <i>O. nigripes</i> | Brazil, Santa Catarina, Ita                                 | 51 | MN62158 (CRB1984)  | MN019581 |   | present paper           |
| <i>O. nigripes</i> | Brazil, Rio Grande do Sul, Nonoi                            | 52 | MN83064 (ARB708)   | MN015447 |   | present paper           |
| <i>O. nigripes</i> | Brazil, Rio Grande do Sul, Aratiba                          | 53 | MN62108 (CRB1909)  | MN019579 |   | present paper           |
| <i>O. nigripes</i> | Brazil, Rio Grande do Sul, Aratiba                          | 53 | (CRB1973)          | MN015586 |   | present paper           |
| <i>O. nigripes</i> | Brazil, Rio Grande do Sul, Aratiba                          | 53 | MN62159 (CRB1985)  | MN019582 |   | present paper           |
| <i>O. nigripes</i> | Brazil, Rio Grande do Sul, Aratiba                          | 53 | (CRB1986)          | MN019600 |   | present paper           |
| <i>O. nigripes</i> | Brazil, Rio Grande do Sul, Aratiba                          | 53 | MN62162 (CRB1995)  | MN019583 |   | present paper           |
| <i>O. nigripes</i> | Brazil, Rio Grande do Sul, Aratiba                          | 53 | MN62165 (CRB1999)  | MN019584 |   | present paper           |
| <i>O. nigripes</i> | Brazil, Rio Grande do Sul, Entre Rios do Sul                | 54 | MN83057 (ARB683)   | MN015496 |   | present paper           |
| <i>O. nigripes</i> | Brazil, Rio Grande do Sul, Erechim                          | 55 | UFPB7434 (JR409)   | GU938975 | * | Müller et al., 2013     |
| <i>O. nigripes</i> | Brazil, Santa Catarina, Florianópolis                       | 56 | (LF2062)           | MN015499 |   | present paper           |
| <i>O. nigripes</i> | Brazil, Rio Grande do Sul, Ronda Alta                       | 57 | UFPB7432 (JR337)   | GU938976 | * | Müller et al., 2013     |
| <i>O. nigripes</i> | Brazil, Rio Grande do Sul, Floresta Nacional de Passo Fundo | 58 | UFPB7446 (DG006)   | GU938876 | * | Müller et al., 2013     |
| <i>O. nigripes</i> | Brazil, Rio Grande do Sul, Floresta Nacional de Passo Fundo | 58 | UFPB7443 (DG000)   | GU938877 | * | Müller et al., 2013     |
| <i>O. nigripes</i> | Brazil, Rio Grande do Sul, Floresta Nacional de Passo Fundo | 58 | UFPB7445 (DG005)   | GU938878 | * | Müller et al., 2013     |
| <i>O. nigripes</i> | Brazil, Rio Grande do Sul, Floresta Nacional de Passo Fundo | 58 | UFPB7444 (DG001)   | GU938886 | * | Müller et al., 2013     |
| <i>O. nigripes</i> | Brazil, Rio Grande do Sul, Floresta Nacional de Passo Fundo | 58 | UFPB7433 (JR339)   | GU938979 | * | Müller et al., 2013     |
| <i>O. nigripes</i> | Brazil, Rio Grande do Sul, Cambara do Sul                   | 59 | (LMT298)           | MN019620 |   | present paper           |
| <i>O. nigripes</i> | Brazil, Rio Grande do Sul, Cambara do Sul                   | 59 | (LMT302)           | MN019621 |   | present paper           |
| <i>O. nigripes</i> | Brazil, Rio Grande do Sul, Cambara do Sul                   | 59 | (LMT303)           | MN019622 |   | present paper           |
| <i>O. nigripes</i> | Brazil, Rio Grande do Sul, Cambara do Sul                   | 59 | (LMT311)           | MN019623 |   | present paper           |
| <i>O. nigripes</i> | Brazil, Rio Grande do Sul, São Francisco de Paula           | 60 | UFPB7442 (OLN31)   | GU938970 | * | Müller et al., 2013     |
| <i>O. nigripes</i> | Brazil, Rio Grande do Sul, São Francisco de Paula           | 60 | UFPB7585 (OPN61)   | GU938972 | * | Müller et al., 2013     |
| <i>O. nigripes</i> | Brazil, Rio Grande do Sul, São Francisco de Paula           | 60 | UFPB7584 (OPN59)   | GU938973 | * | Müller et al., 2013     |
| <i>O. nigripes</i> | Brazil, Rio Grande do Sul, São Francisco de Paula           | 60 | UFPB7583 (OPN58)   | GU938974 | * | Müller et al., 2013     |
| <i>O. nigripes</i> | Brazil, Rio Grande do Sul, São Francisco de Paula           | 60 | UFPB7579 (ON1)     | GU938978 | * | Müller et al., 2013     |
| <i>O. nigripes</i> | Brazil, Rio Grande do Sul, São Francisco de Paula           | 60 | UFPB7580 (OPN52)   | GU938980 | * | Müller et al., 2013     |
| <i>O. nigripes</i> | Brazil, Rio Grande do Sul, São Francisco de Paula           | 60 | UFPB7581 (OPN55)   | GU938981 | * | Müller et al., 2013     |
| <i>O. nigripes</i> | Brazil, Rio Grande do Sul, São Francisco de Paula           | 60 | UFPB7586 (OPN64)   | GU938982 | * | Müller et al., 2013     |
| <i>O. nigripes</i> | Brazil, Rio Grande do Sul, São Francisco de Paula           | 60 | UFPB7587 (OPN87)   | GU938983 | * | Müller et al., 2013     |
| <i>O. nigripes</i> | Brazil, Rio Grande do Sul, São Francisco de Paula           | 60 | UFPB7582 (OPN57)   | GU938984 | * | Müller et al., 2013     |
| <i>O. nigripes</i> | Brazil, Rio Grande do Sul, Terra de Areia                   | 61 | UFPB7441 (JR518)   | GU938887 | * | Müller et al., 2013     |
| <i>O. nigripes</i> | Brazil, Rio Grande do Sul, Terra de Areia                   | 61 | UFPB7436 (JR425)   | GU938888 | * | Müller et al., 2013     |
| <i>O. nigripes</i> | Brazil, Rio Grande do Sul, Terra de Areia                   | 61 | UFPB7437 (JR426)   | GU938889 | * | Müller et al., 2013     |
| <i>O. nigripes</i> | Brazil, Rio Grande do Sul, Terra de Areia                   | 61 | UFPB7438 (JR457)   | GU938890 | * | Müller et al., 2013     |

Table S1. Taxonomic sampling of *Oligoryzomys* used in the present study.

|                            |                                                        |             |                     |               |   |                         |
|----------------------------|--------------------------------------------------------|-------------|---------------------|---------------|---|-------------------------|
| <i>O. nigripes</i>         | Brazil, Rio Grande do Sul, Terra de Areia              | 61          | UFPB7439 (JR458)    | GU938898      | * | Müller et al., 2013     |
| <i>O. nigripes</i>         | Brazil, Rio Grande do Sul, Terra de Areia              | 61          | UFPB7440 (JR459)    | GU938899      | * | Müller et al., 2013     |
| <i>O. nigripes</i>         | Brazil, Rio Grande do Sul, Terra de Areia              | 61          | UFPB7435 (JR363)    | GU938977      | * | Müller et al., 2013     |
| <i>O. nigripes</i>         | Brazil, Rio Grande do Sul, Osório                      | 63          | (LF1035)            | MN015514      |   | present paper           |
| <i>O. nigripes</i>         | Brazil, Rio Grande do Sul, Osório                      | 63          | (LF1074)            | MN015440      |   | present paper           |
| <i>O. nigripes</i>         | Brazil, Rio Grande do Sul, Osório                      | 63          | (LF989)             | MN015493      |   | present paper           |
| <i>O. nigripes</i>         | Brazil, Rio Grande do Sul, Osório                      | 63          | MN37616 (LF976)     | MN015483      |   | present paper           |
| <i>O. nigripes</i>         | Brazil, Rio Grande do Sul, Mostardas                   | 65          | MN37633 (LF2095)    | MN015432      |   | present paper           |
| <i>O. nigripes</i>         | Brazil, Rio Grande do Sul, Estacao Ecologica do Taim   | 66          | MCNU4154 (TAIM29)   | (BRMAM557-15) |   | BOLD                    |
| <i>O. rupestris</i>        | Brazil, Goiás, Alto Paraíso                            | 24          | MN50322 (CRB1079)   | MF951072      |   | da Cruz & Weksler, 2018 |
| <i>O. rupestris</i>        | Brazil, Goiás, Alto Paraíso                            | 24          | MN50325 (CRB1109)   | MN019595      |   | present paper           |
| <i>O. rupestris</i>        | Brazil, Bahia, Itacê                                   | 36          | (LG0214)            | MN015503      |   | present paper           |
| <i>Oligoryzomys</i> sp. n. | Brazil, Roraima, Pacaraima                             | 8           | MPEG34779           | MN015439      |   | present paper           |
| <i>Oligoryzomys</i> sp. n. | Brazil, Roraima, Pacaraima                             | 8           | MPEG34802           | MN015468      |   | present paper           |
| <i>O. stramineus</i>       | Brazil, Goiás, Teresina de Goiás, Fazenda Vão dos Bois | 21          | MN34439 (CRB607)    | MN019596      |   | present paper           |
| <i>O. d. spodiurus</i>     | Ecuador, Cotopaxi, Otonga                              | 67          | QCAZ8678            | MF806174      |   | Pinto et al. 2018       |
| <i>O. stramineus</i>       | Brazil, Goiás, Teresina de Goiás, Fazenda Vão dos Bois | 21          | MN46409 (CRB677)    | MN019597      |   | present paper           |
| <i>O. d. spodiurus</i>     | Ecuador, Cotopaxi, Otonga                              | 67          | QCAZ8681            | MF806173      |   | Pinto et al. 2018       |
| <i>O. stramineus</i>       | Brazil, Goiás, Teresina de Goiás, Fazenda Vão dos Bois | 21          | (CRB3054)           | MN015444      |   | present paper           |
| <i>O. stramineus</i>       | Brazil, Goiás, São Domingos                            | 22          | UNB2640 (ARB429)    | MN015460      |   | present paper           |
| <i>O. stramineus</i>       | Brazil, Goiás, São Domingos                            | 22          | UNB2641 (ARB430)    | MN015448      |   | present paper           |
| <i>O. stramineus</i>       | Brazil, Goiás, São Domingos                            | 22          | UNB2642 (ARB435)    | MN015495      |   | present paper           |
| <i>O. stramineus</i>       | Brazil, Goiás, Flores de Goiás                         | 26          | (AL2955)            | MN015443      |   | present paper           |
| <i>O. stramineus</i>       | Brazil, Goiás, Flores de Goiás                         | 26          | (AL2956)            | MN015498      |   | present paper           |
| <i>O. stramineus</i>       | Brazil, Goiás, Alvorada do Norte                       | 27          | UNB2637 (ARB397)    | MN015451      |   | present paper           |
| <i>O. stramineus</i>       | Brazil, Goiás, Alvorada do Norte                       | 27          | UNB2638 (ARB411)    | MN015507      |   | present paper           |
| <i>O. stramineus</i>       | Brazil, Goiás, Alvorada do Norte                       | 27          | UNB2648 (ARB575)    | MN015428      |   | present paper           |
| <i>O. stramineus</i>       | Brazil, Goiás, Alvorada do Norte                       | 27          | UNB2649 (ARB600)    | MN015436      |   | present paper           |
| <i>O. stramineus</i>       | Brazil, Goiás, Alvorada do Norte                       | 27          | UNB2650 (ARB601)    | MN015488      |   | present paper           |
| <i>O. stramineus</i>       | Brazil, Sergipe, Canindé de São Francisco              | 32          | UFPB9767 (ARB791)   | MN015435      |   | present paper           |
| <i>O. stramineus</i>       | Brazil, Sergipe, Canindé de São Francisco              | 32          | UFPB9776 (ARB801)   | MN015487      |   | present paper           |
| <i>O. stramineus</i>       | Brazil, Bahia, Paulo Afonso                            | 33          | UFPB9766 (ARB790)   | MN015500      |   | present paper           |
| <i>O. stramineus</i>       | Brazil, Bahia, Paulo Afonso                            | 33          | UFPB9768 (ARB792)   | MN015512      |   | present paper           |
| <i>O. stramineus</i>       | Brazil, Bahia, Paulo Afonso                            | 33          | UFPB9769 (ARB793)   | MN015505      |   | present paper           |
| <i>O. stramineus</i>       | Brazil, Bahia, Paulo Afonso                            | 33          | UFPB9771 (ARB796)   | MN015430      |   | present paper           |
| <i>O. stramineus</i>       | Brazil, Bahia, Paulo Afonso                            | 33          | UFPB9773 (ARB798)   | MN015470      |   | present paper           |
| <i>O. stramineus</i>       | Brazil, Bahia, Paulo Afonso                            | 33          | UFPB9775 (ARB800)   | MN015489      |   | present paper           |
| <i>O. stramineus</i>       | Brazil, Bahia, Paulo Afonso                            | 33          | UFPB9793 (ARB823)   | MN015455      |   | present paper           |
| <i>O. stramineus</i>       | Brazil, Bahia, Palmeiras                               | 34          | MN84348 (MW303)     | MN015510      |   | present paper           |
| <i>O. stramineus</i>       | Brazil, Bahia, Lençóis                                 | 35          | MZ33820             | MN015509      |   | present paper           |
| <i>O. utaritensis</i>      | Brazil, Pará, Altamira, Castelo dos Sonhos             | 12          | MN75612 (SVS288)    | MF951075      |   | da Cruz & Weksler, 2018 |
| <i>O. utaritensis</i>      | Brazil, Mato Grosso, Bom Jesus do Araguaia             | 17          | (ARB749)            | MN015472      |   | present paper           |
| <i>O. utaritensis</i>      | Brazil, Mato Grosso, Ribeirão Cascalheira              | 18          | (ARB752)            | MN015465      |   | present paper           |
| <i>O. utaritensis</i>      | Brazil, Mato Grosso, Ribeirão Cascalheira              | 18          | (ARB761)            | MN015511      |   | present paper           |
| <i>O. utaritensis</i>      | Brazil, Mato Grosso, Ribeirão Cascalheira              | 18          | (ARB762)            | MN015459      |   | present paper           |
| <i>O. utaritensis</i>      | Brazil, Mato Grosso, Ribeirão Cascalheira              | 18          | (ARB763)            | MN015490      |   | present paper           |
| <i>O. utaritensis</i>      | Brazil, Mato Grosso, Sapezal, Fazenda Begolim          | 19          | MN75595 (LBCE12174) | MN019598      |   | present paper           |
| <i>O. utaritensis</i>      | Brazil, Mato Grosso, Sapezal, Fazenda Begolim          | 19          | MN75598 (LBCE12186) | MF951074      |   | da Cruz & Weksler, 2018 |
| <i>O. utaritensis</i>      | Brazil, Mato Grosso, Sapezal, Fazenda Begolim          | 19          | MN75599 (LBCE12225) | MN019599      |   | present paper           |
| <i>O. utaritensis</i>      | Brazil, Mato Grosso, Campo Novo dos Parecis            | 20          | MN75616 (SVS299)    | MF951076      |   | da Cruz & Weksler, 2018 |
| <i>O. vegetus</i>          | Costa Rica, Cartago, Volcan Irazu                      | not plotted | ROM113156           | EU095457      |   | Borisenko et al. 2008   |
| <i>O. vegetus</i>          | Nicaragua, Rivas                                       | not plotted | ROM112192           | JF491683      |   | GenBank                 |
